# Supplementary material for: Flow of condensed particles around a packing front visualized by drying colloidal suspensions on a tilted substrate
Source: Royal Society of Chemistry journal article supplement (doi:10.1039/c9sm00280d), 2019-01-01
Supplement: c9sm00280d1.pdf [file c9sm00280d1.pdf]

### Electronically Supplemental Information (ESI)

#### Flow of condensed particles around a packing front visualized by drying colloidal suspensions on a tilted substrate.

Takuho Mizuguchi<sup>1</sup> and Susumu Inasawa<sup>1,2\*</sup>

<sup>1</sup>*Graduate School of Bio-Applications and Systems Engineering, Tokyo University of Agriculture and Technology, Koganei, Tokyo 184-8588, Japan*

<sup>2</sup>*Department of Chemical Engineering, Tokyo University of Agriculture and Technology, Koganei, Tokyo 184-8588, Japan*

E-mail: inasawa@cc.tuat.ac.jp

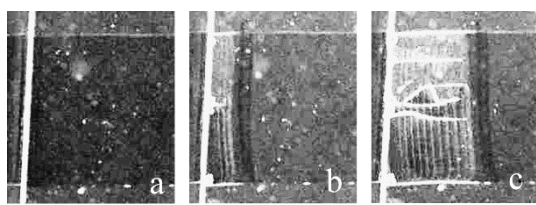

Figure S1 Digital camera images of a drying 10-nm particle suspension with 60 mM NaCl.  $\theta = 90^\circ$ .

Drying times were (a) 0 min, (b) 40 min and (c) 120 min. The scale bar is 1 mm.
